# Supplementary material
Source: PubMed Central journal article supplement (PMC3329375)
Supplement: NIHMS356355-supplement-2_si_002.pdf [file NIHMS356355-supplement-2_si_002.pdf]

Supporting Information for:

# *In Situ* Assembly of Octahedral Fe(II) Complexes for the Enantiomeric Excess Determination of Chiral Amines Using CD Spectroscopy

Justin Dragna, Gennaro Pescitelli, Lee Tran, Vincent M. Lynch, Eric V. Anslyn,\* and Lorenzo Di Bari\*

I. General Experimental Details

II. Experimental Details on:

- a) Calibration Curves and Test Sample Experimental for **MBI**
- b) Calibration Curves and Test Sample Experimental for **CEI**
- c) Calibration Curves and Test Sample Experimental for **HPI**

III. Calculations for:

- a) Probability
- b) CD curves in visible region

IV. Tables

Table S-1. A summary of the calculated probabilities for populations of different isomer sets and how they vary with *ee*.

Table S-2. A summary of the calculated probabilities for populations of different isomer sets at different *ees*

V. Figures

Figure S-1. Overlay of all data points for the calibration curves developed for **MBI** at 3mM, 4mM, and 5mM at 1mM Fe(TfO)<sub>2</sub> in acetonitrile in a 0.1cm quartz cuvette.

Figure S-2. Overlay of all data points for calibration curves developed for **MBI** at 6mM, 7mM, 8mM, and 9mM at 1mM Fe(TfO)<sub>2</sub> in acetonitrile in a 0.1cm quartz cell.

Figure S-3. Overlay of all data points for calibration curve developed for **MBI** at 6mM and 1mM Fe(TfO)<sub>2</sub> in acetonitrile in a 0.1cm quartz cell.

Figure S-4. A graph of the probability of the four different isomer sets as functions of enantiomeric excess.

Figure S-5. A graph of the four different isomer sets as a functions of enantiomeric excess with the introduction of a sign change for predominantly *S* isomer sets.

Figure S-6. The <sup>1</sup>H NMR of the **MBI**-iron(II) complex at -100% *ee*.

Figure S-7. The <sup>1</sup>H NMR of the **MBI**-iron(II) complex at -60% *ee*.

Figure S-8. The <sup>1</sup>H NMR of the **MBI**-iron(II) complex at -20% *ee*.

Figure S-9. The <sup>1</sup>H NMR of the **MBI**-iron(II) complex at 0% *ee*.

Figure S-10. The <sup>1</sup>H NMR of the **MBI**-iron(II) complex at 20% *ee*.

Figure S-11. The <sup>1</sup>H NMR of the **MBI**-iron(II) complex at 60% *ee*.

Figure S-12. The <sup>1</sup>H NMR of the **MBI**-iron(II) complex at 100% *ee*.

Figure S-13. <sup>1</sup>H NMR of 10mM aldehyde **3** and 6mM **MBI**.

Figure S-14. <sup>1</sup>H NMR of 10mM aldehyde **3** and 6mM of **CEI**.

Figure S-15. <sup>1</sup>H NMR of 10mM aldehyde **3** and 6mM **HPI**.

## VI. X-ray Crystallographic Data

Table S-3. Crystallographic data.

Table S-4. Fractional coordinates and equivalent isotropic thermal parameters (Å<sup>2</sup>) for the non-hydrogen atoms.

Table S-5. Bond Lengths (Å) and angles (°) for the non-hydrogen atoms.

Table S-6. Anisotropic thermal parameters for the non-hydrogen atoms.

Table S-7. Fractional coordinates and isotropic thermal parameters (Å<sup>2</sup>) for the hydrogen atoms.

## VII. Computational Details

### I. General Experimental Details:

All reagents were purchased from commercial sources and used as received with the exception of aldehyde **1**. Aldehyde **1** was purified by sublimation under high vacuum with mild heat (60-70°C) using a cold finger apparatus before use in the assay. HPLC grade acetonitrile purged for 2 hours with nitrogen was used throughout. An automated Varian Mercury 400MHz spectrometer was used to collect <sup>1</sup>H NMR spectra. Solutions were dispensed into Microamp<sup>®</sup>

optical 96-well reaction plates purchased from applied biosystems using multichannel and single channel eppendorf research pipettes. CD spectra measurements were taken on a JASCO-815 CD spectrometer outfitted with an autosampler. 96-well reaction plates were sealed during equilibration periods using viewseal advanced sealing tapes purchased from E&K Scientific.

## **II. Experimental Details on:**

### a) Calibration Curves and Test Sample Experimental for **MBI**:

A solution of aldehyde **1** at 18mM was transferred in 100 microL aliquots to a 96-well plate. To this was added 100 microL aliquots of a solution of 15mM 1-aminomethyl benzene for the calibration curve developed at 5mM, 12mM 1-aminomethylbenzene for calibration curve developed at 4mM, and 9mM for the calibration curve developed at 3mM. 100microL of a 3mM Fe(TfO)<sub>2</sub> solution was then aliquoted into each well and the plate was sealed for 3 hours before being placed on the autosampler for spectral measurements. Test samples were prepared and run in an analogous manner from a 15mM stock solution of 1-aminomethylbenzene and diluted accordingly.

### b) Calibration Curves and Test Sample Experimental for **CEI**:

A solution of aldehyde **1** at 36mM was transferred in 100 microL aliquots to a 96-well plate. To this was added 100 microL aliquots of a solution of 27mM 1-cyclohexylethyl amine for the calibration curve developed at 9mM, 24mM 1-cyclohexylethyl amine for the calibration curve developed at 8mM, 21mM for the calibration curve developed at 7mM and 18mM for the calibration curve developed at 6mM. 100microL of a 3mM Fe(TfO)<sub>2</sub> solution was then aliquoted into each well and the plate was sealed for 3 hours before being placed on the autosampler for spectral measurements. Test samples were prepared in an analogous manner from a 36mM stock solution of 1-cyclohexylethyl amine and diluted accordingly.

### c) Calibration Curves and Test Sample Experimental for **HPI**:

A solution of aldehyde **1** at 18mM was transferred in 100 microL aliquots to a 96-well plate. To this was added 100 microL aliquots of a solution of 18mM 2-aminoheptane for the

calibration curve developed at 6mM. 100microL of a 3mM Fe(TfO)<sub>2</sub> solution was then aliquoted into each well and the plate was sealed for 3 hours before being placed on the autosampler for spectral measurements. Test samples were prepared in an analogous manner from a 36mM stock solution of 2-aminoheptane and diluted accordingly.

### III. Calculations for:

a) Probability:

The probability (P) is calculated for a pool of 100 molecules.

#### **100% ee**

Isomer set (R,R,R)

$$P = \left(\frac{100}{100}\right)\left(\frac{99}{99}\right)\left(\frac{98}{98}\right) = 1$$

Because the sum of the probabilities must equal 1 isomer sets (R,R,S), (S,S,R), and (S,S,S) must equal 0.

#### **80% ee**

**At 80% ee there are 90 imine molecules with R stereogenic centers and 10 imine molecules with S stereogenic centers.**

Isomer set (R,R,R)

$$P = \left(\frac{90}{100}\right)\left(\frac{89}{99}\right)\left(\frac{88}{98}\right) = 0.73$$

Isomer set (R,R,S)

$$P = 3 \left(\frac{90}{100}\right)\left(\frac{89}{99}\right)\left(\frac{10}{98}\right) = 0.25$$

Isomer set (S,S,R)

$$P = 3 \left(\frac{10}{100}\right)\left(\frac{9}{99}\right)\left(\frac{90}{98}\right) = 0.0083$$

Isomer set (*S,S,S*)

$$P = \left(\frac{10}{100}\right)\left(\frac{9}{99}\right)\left(\frac{8}{98}\right) = 0.00074$$

The probabilities for the remaining *ees* are calculated in an analogous manner, and are summarized in Table S-1. A graph of the probabilities for the different isomer sets is shown in Figure S-4.

Enantiomers have equal and opposite CD signals. In order to reflect this in the probabilistic model, a negative sign is introduced for isomer sets that are predominantly *S* as seen in Table S-2. This is based on the sign of CD signal observed for -100% *ee* (all *S* imines) at the wavelength the calibration curves were taken at. A graph of how the probabilities vary with *ee* for the various isomer sets is shown in Figure S-5.

Finally, the observed CD signal will result in cancellation from enantiomeric pairs between predominantly *R* and predominantly *S* isomer sets. This can be reflected by summing the signed probabilities from Table S-2. The arithmetic sums are in Table 2. and a graph of the arithmetic sums are in Figure 4.

#### b) CD curves in visible region

In the visible region, the calculations also led to a bisignate CD feature, though with opposite sign with respect to the experiment as far as the  $\Delta$ -*fac* diastereomer is concerned (not shown). The discrepancy was not alleviated after considering the contributions from other diastereomers. For our purposes, is interesting to notice that population and orbital analysis revealed that the two calculated CD bands between 500-700 nm are both due to the combination of d-to- $\pi^*$  transitions involving the two lowest-energy and degenerate d $\pi$  orbitals. Moreover, both transitions have the same E symmetry, therefore they cannot represent two ECCD components.

**IV. Tables:**

| <i>ee</i> | ( <i>R,R,R</i> ) | ( <i>R,R,S</i> ) | ( <i>S,S,R</i> ) | ( <i>S,S,S</i> ) | sum |
|-----------|------------------|------------------|------------------|------------------|-----|
| 1         | 1                | 0                | 0                | 0                | 1   |
| 0.8       | 0.73             | 0.25             | 0.025            | 0.00074          | 1   |
| 0.6       | 0.51             | 0.39             | 0.094            | 0.0071           | 1   |
| 0.4       | 0.34             | 0.45             | 0.19             | 0.025            | 1   |
| 0.2       | 0.21             | 0.44             | 0.29             | 0.061            | 1   |
| 0         | 0.12             | 0.38             | 0.38             | 0.12             | 1   |
| -0.2      | 0.061            | 0.29             | 0.44             | 0.21             | 1   |
| -0.4      | 0.025            | 0.19             | 0.45             | 0.34             | 1   |
| -0.6      | 0.0071           | 0.094            | 0.39             | 0.51             | 1   |
| -0.8      | 0.00074          | 0.025            | 0.25             | 0.73             | 1   |
| -1        | 0                | 0                | 0                | 1                | 1   |

Table S-1. A summary of the calculated probabilities for populations of different isomer sets and how they vary with *ee*. The last column shows that the sum of all the probabilities is always 1 as required for a probabilistic model.

| <i>ee</i> | ( <i>R,R,R</i> ) | ( <i>R,R,S</i> ) | ( <i>S,S,R</i> ) | ( <i>S,S,S</i> ) |
|-----------|------------------|------------------|------------------|------------------|
| 1         | 1                | 0                | 0                | 0                |
| 0.8       | 0.73             | 0.25             | -0.025           | -0.00074         |
| 0.6       | 0.51             | 0.39             | -0.094           | -0.0071          |
| 0.4       | 0.34             | 0.45             | -0.19            | -0.025           |
| 0.2       | 0.21             | 0.44             | -0.29            | -0.061           |
| 0         | 0.12             | 0.38             | -0.38            | -0.12            |
| -0.2      | 0.061            | 0.29             | -0.44            | -0.21            |
| -0.4      | 0.025            | 0.19             | -0.45            | -0.34            |
| -0.6      | 0.0071           | 0.094            | -0.39            | -0.51            |
| -0.8      | 0.00074          | 0.025            | -0.25            | -0.73            |
| -1        | 0                | 0                | 0                | -1               |

Table S-2. A summary of the calculated probabilities for populations of different isomer sets at different *ees*. A negative sign is introduced for the probabilities for (*S,S,R*) and (*S,S,S*) to reflect the equal and opposite nature of CD signals for different enantiomers.

V. Figures:

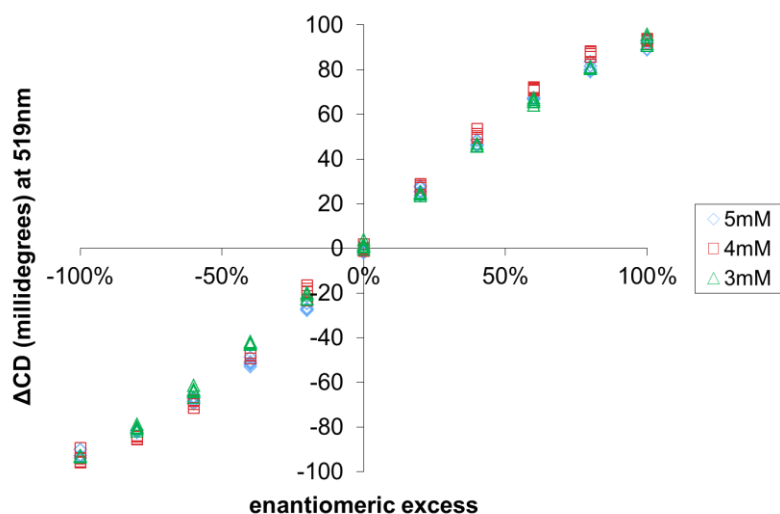

Figure S-1. Overlay of all data points for the calibration curves developed for **MBI** at 3mM, 4mM, and 5mM at 1mM Fe(TfO)<sub>2</sub> in acetonitrile in a 0.1cm quartz cuvette.

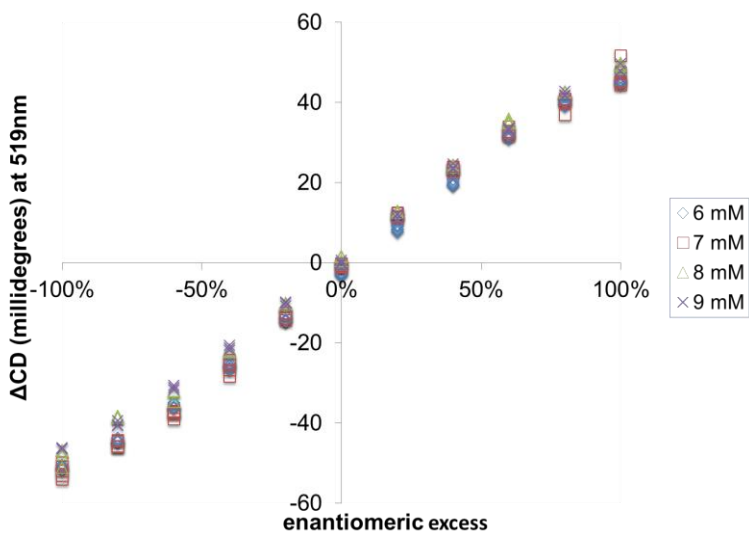

Figure S-2. Overlay of all data points for calibration curves developed for **CEI** at 6mM, 7mM, 8mM, and 9mM at 1mM Fe(TfO)<sub>2</sub> in acetonitrile in a 0.1cm quartz cell.

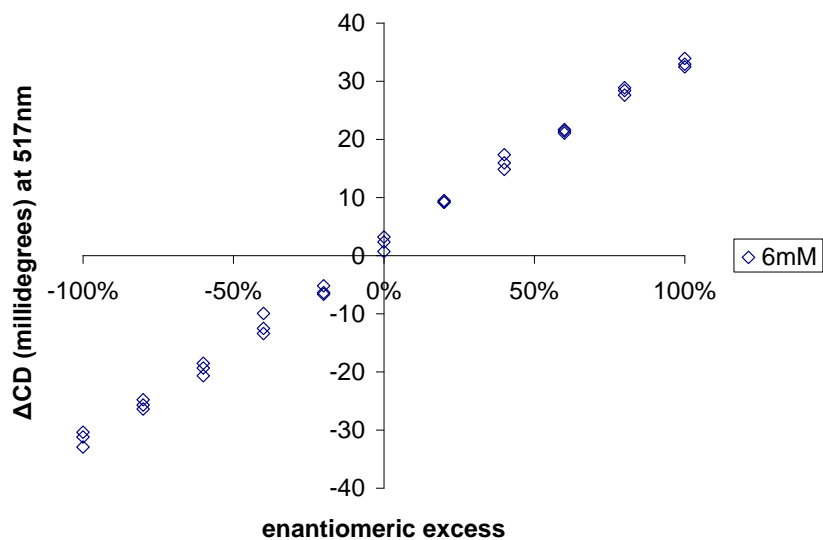

Figure S-3. Overlay of all data points for calibration curve developed for **HPI** at 6mM and 1mM Fe(TfO)<sub>2</sub> in acetonitrile in a 0.1cm quartz cell.

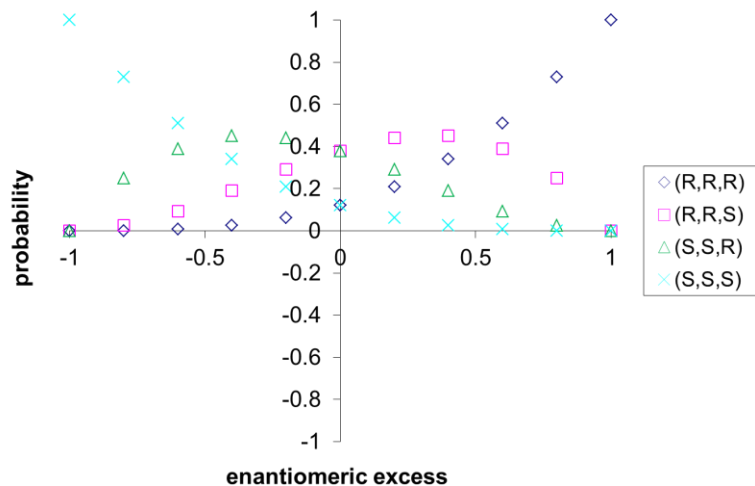

Figure S-4. A graph of the probability of the four different isomer sets as functions of enantiomeric excess.



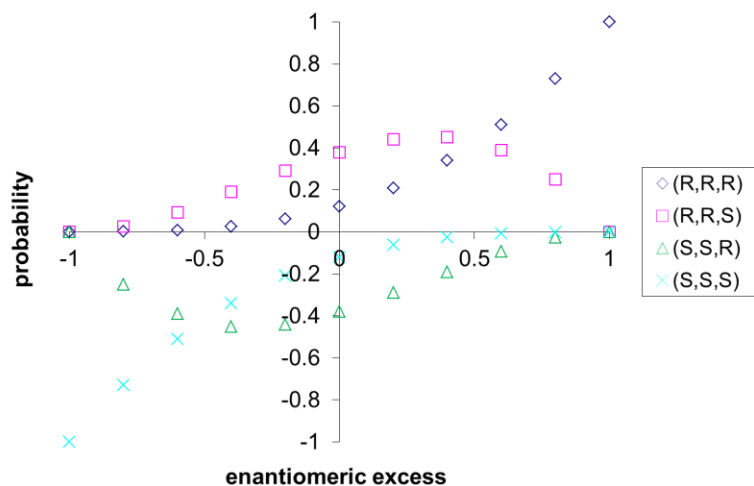

Figure S-5. A graph of the four different isomer sets as a functions of enantiomeric excess with the introduction of a sign change for predominantly *S* isomer sets.

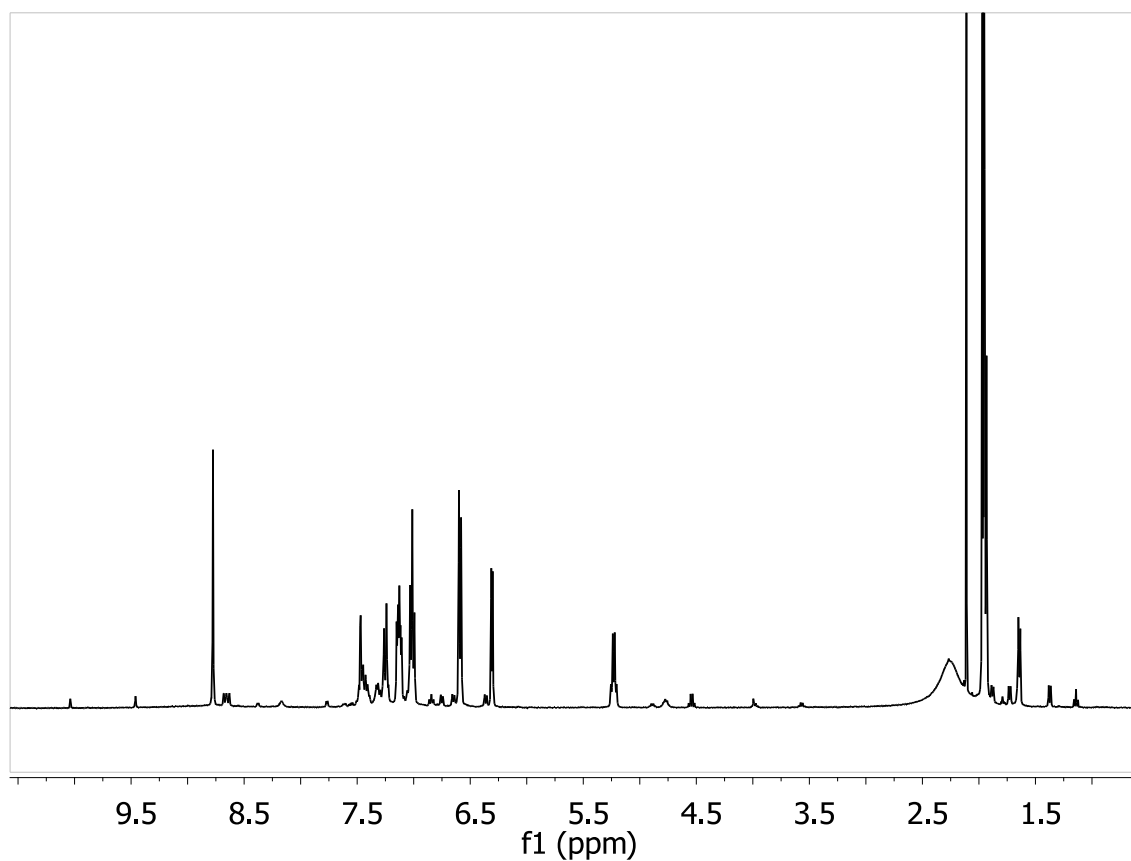

Figure S-6. The <sup>1</sup>H NMR of the **MBI**-iron(II) complex at -100% *ee*.

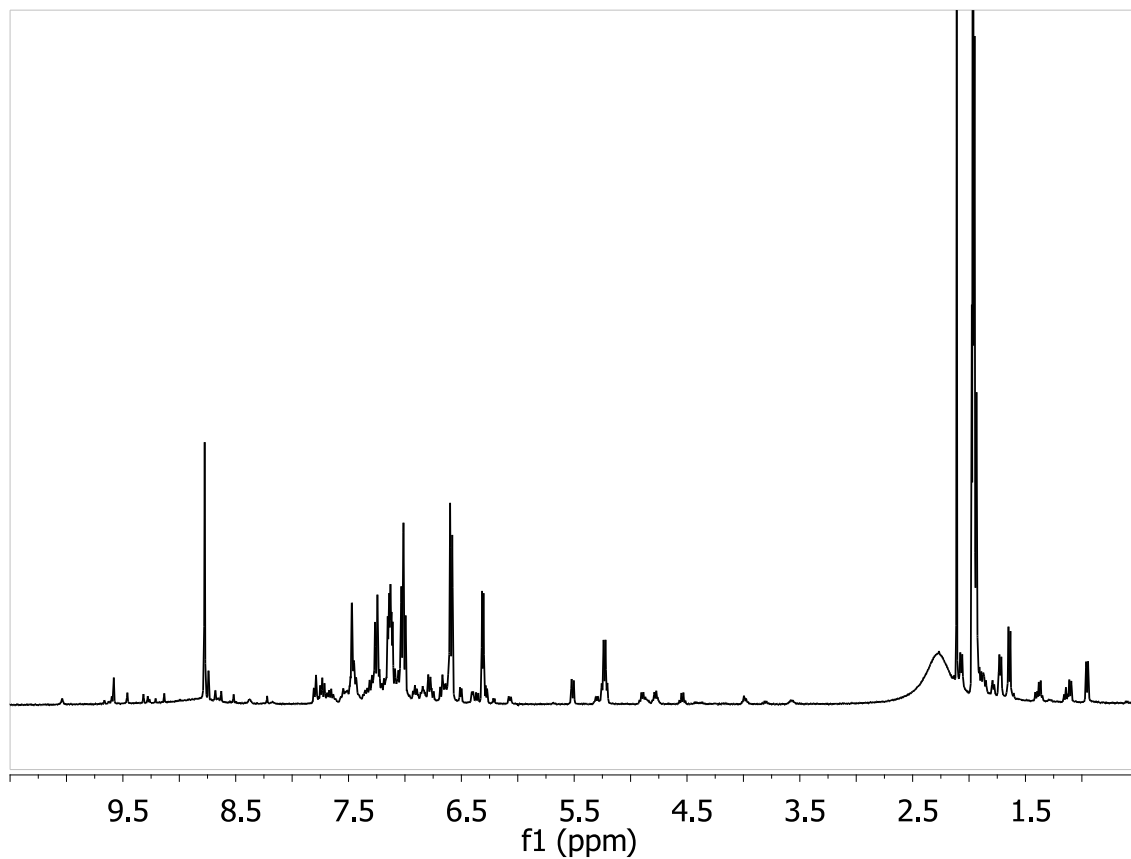

S-7. The  $^1\text{H}$  NMR of the **MBI**-iron(II) complex at -60% *ee*.

Figure

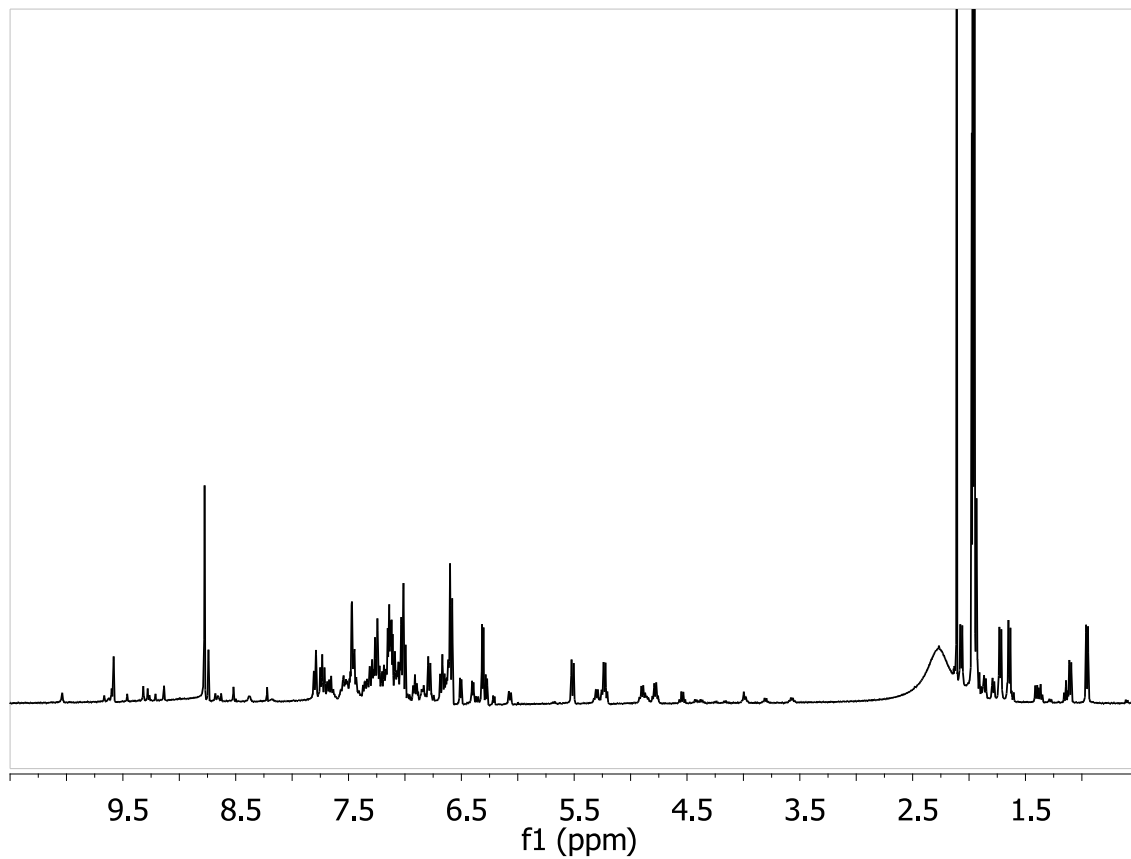

Figure S-8. The  $^1\text{H}$  NMR of the **MBI**-iron(II) complex at -20% *ee*.

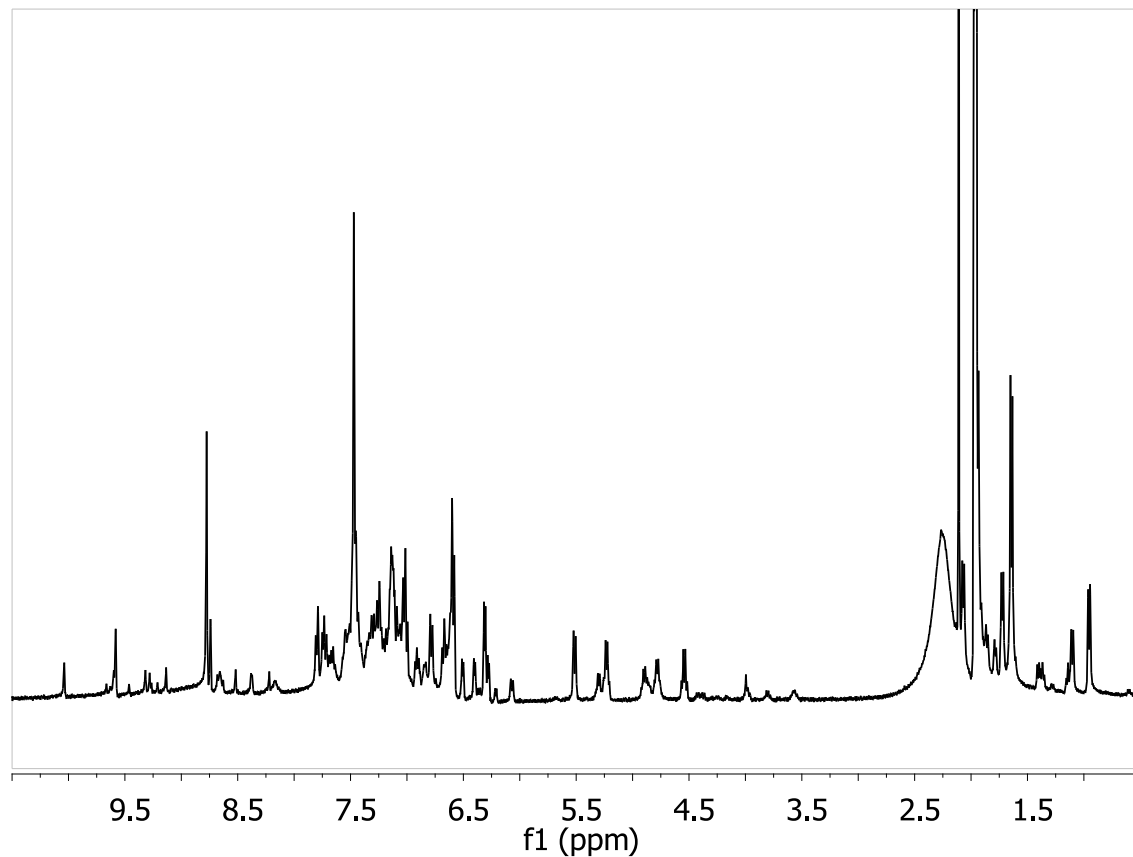

Figure S-9. The  $^1\text{H}$  NMR of the **MBI**-iron(II) complex at 0% *ee*.

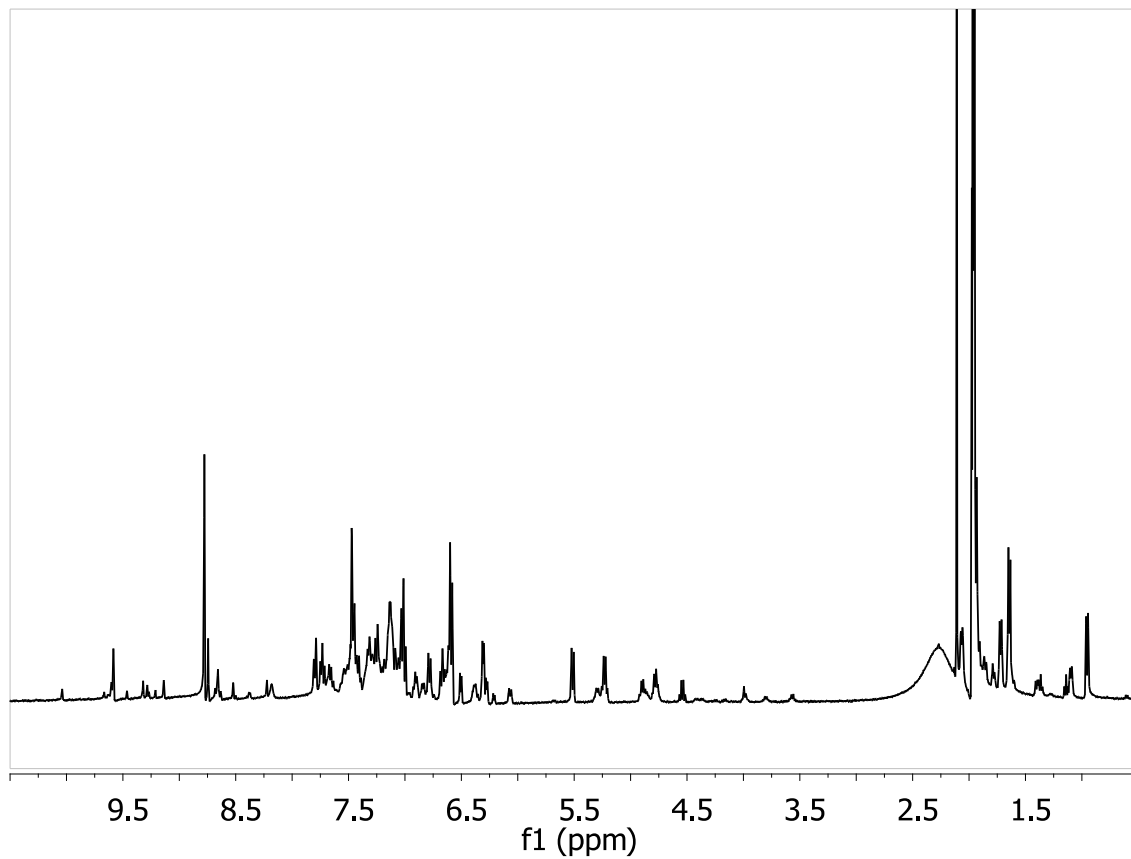

Figure S-10. The  $^1\text{H}$  NMR of the **MBI**-iron(II) complex at 20% *ee*.

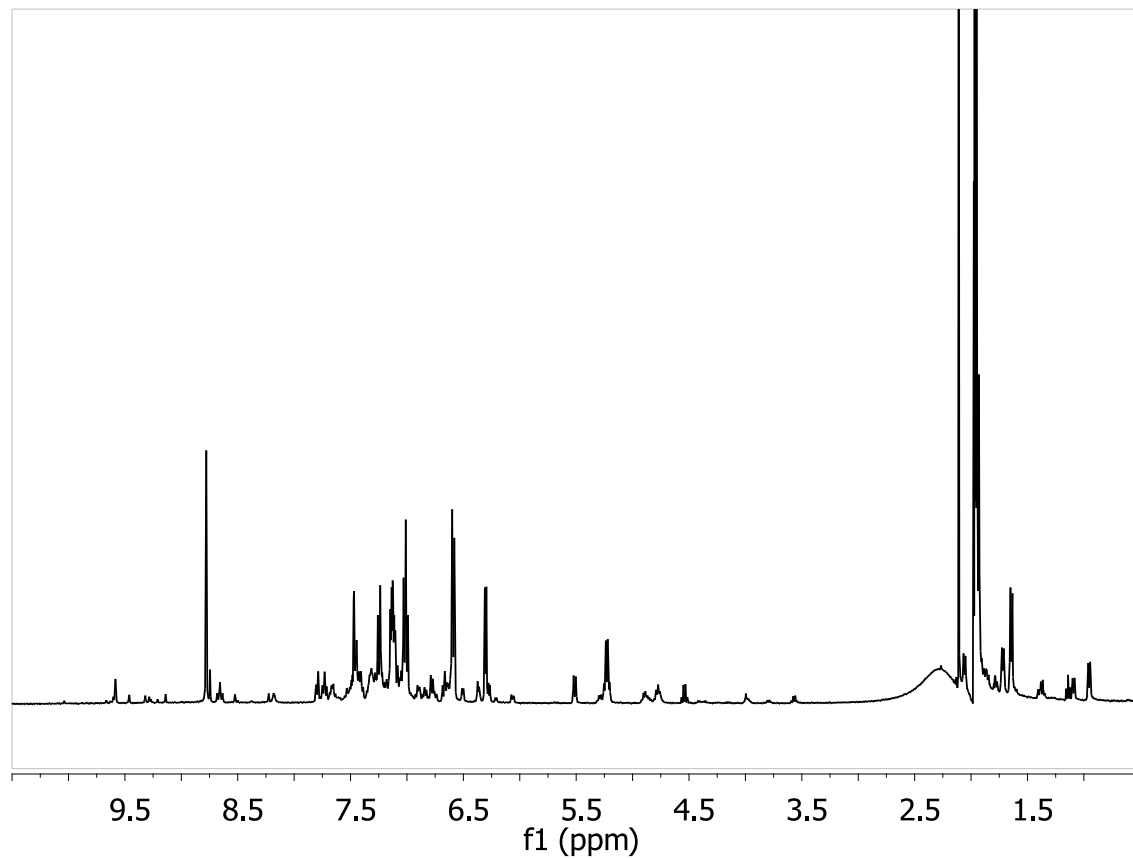

Figure S-11. The  $^1\text{H}$  NMR of the **MBI**-iron(II) complex at 60% *ee*.

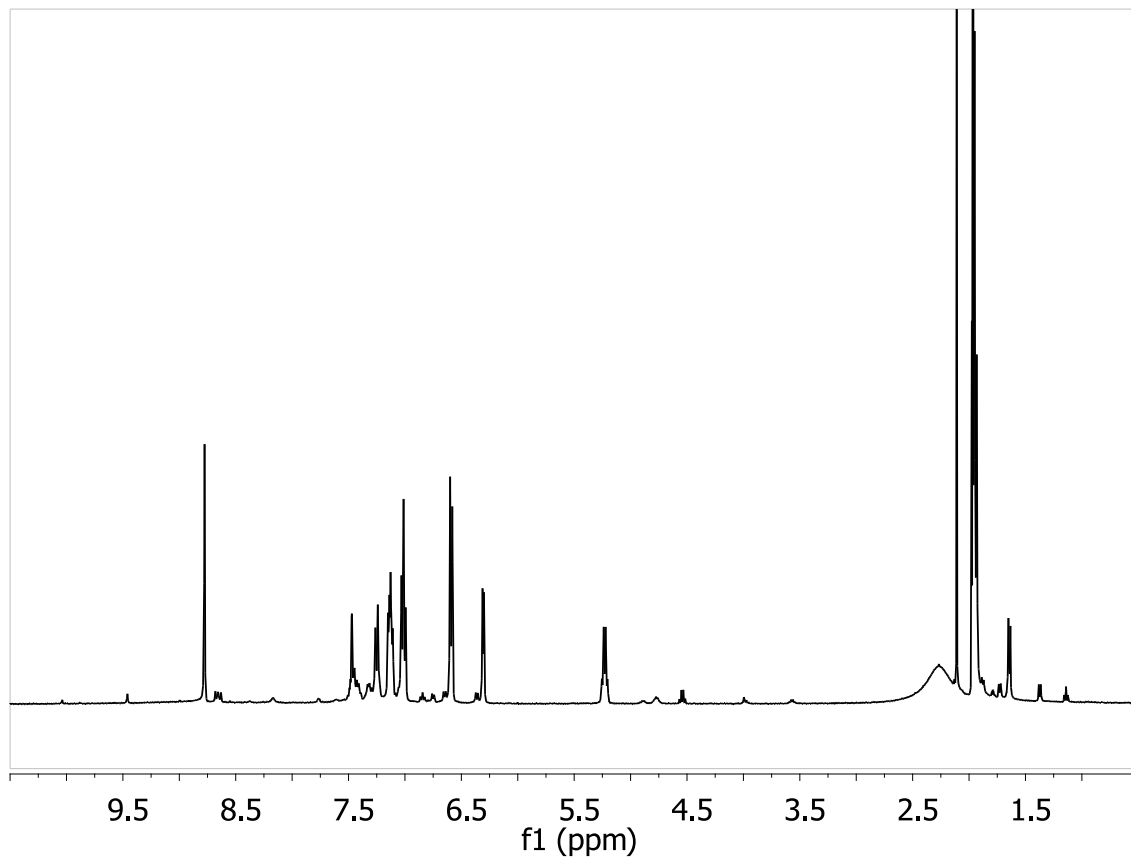

Figure S-12. The  $^1\text{H}$  NMR of the **MBI**-iron(II) complex at 100% *ee*.

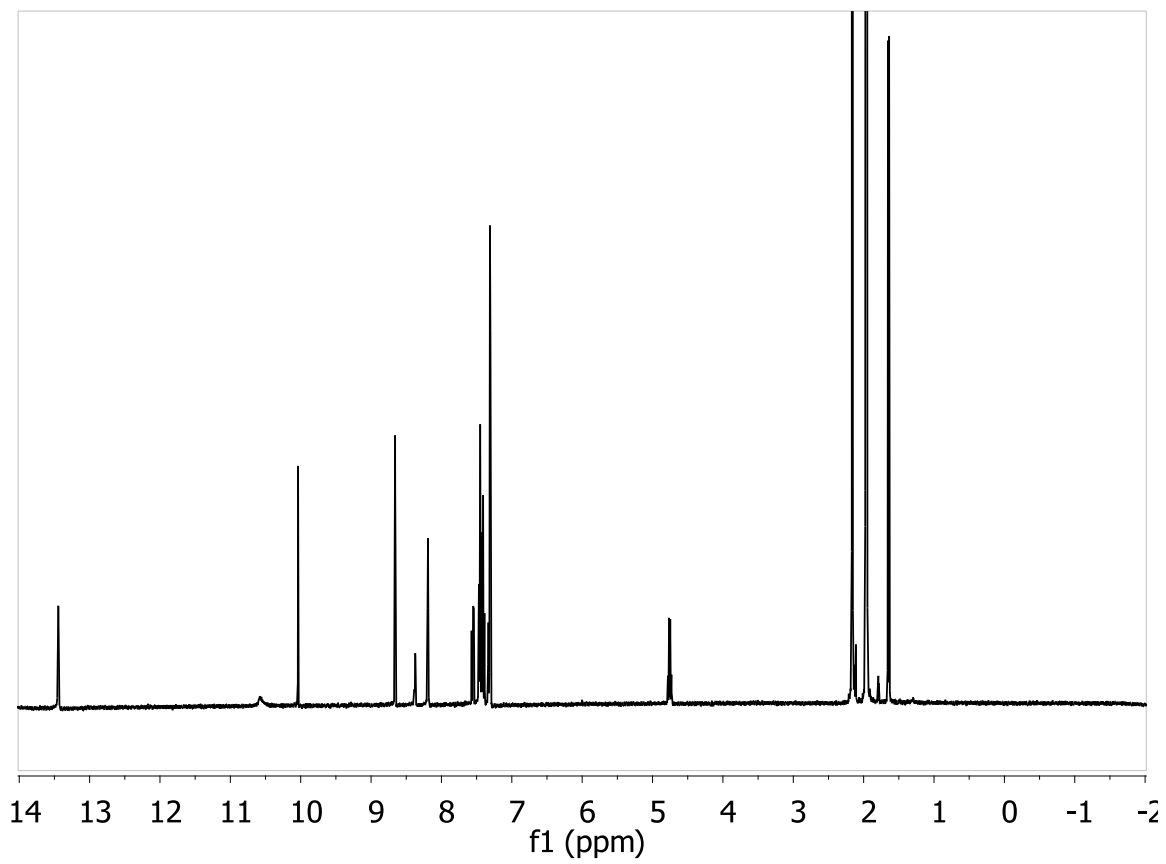

Figure S-13.  $^1\text{H}$  NMR of 10mM aldehyde **3** and 6mM **HPI**.



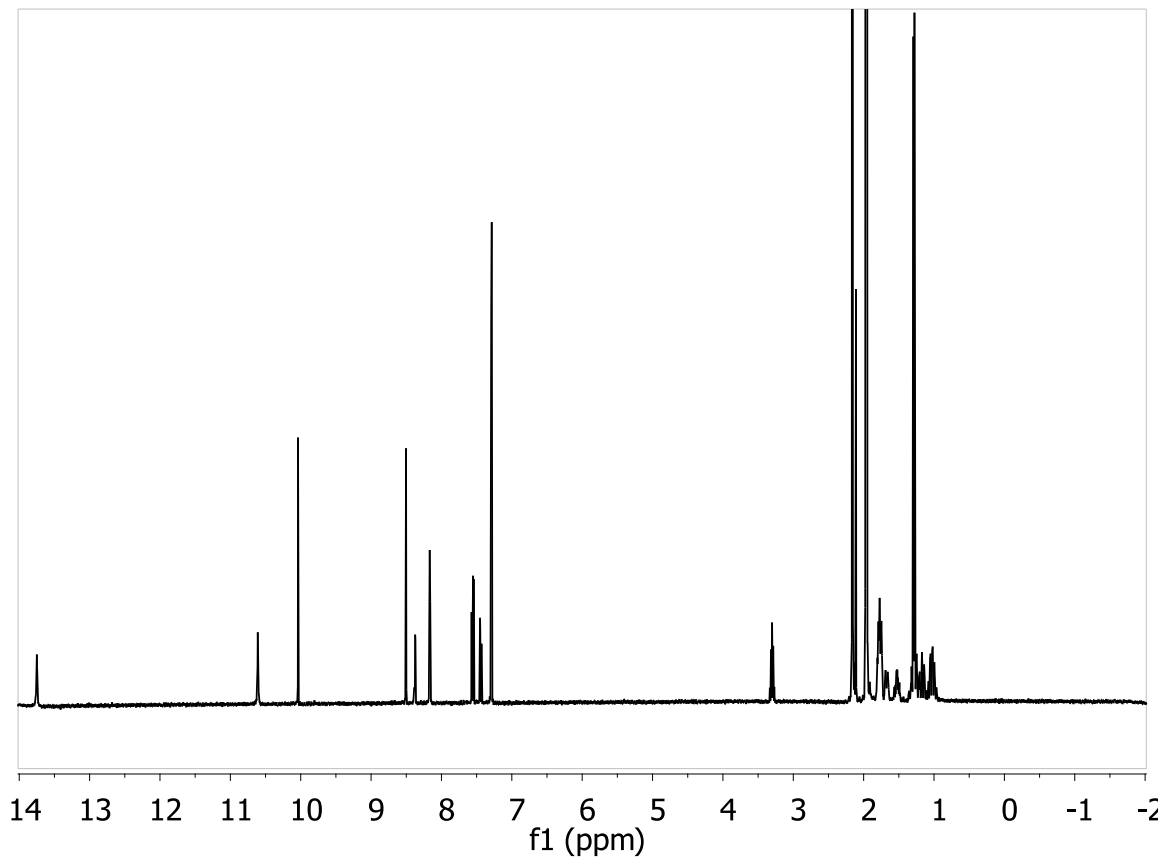

Figure S-14.  $^1\text{H}$  NMR of 10mM aldehyde **3** and 6mM of CEI.

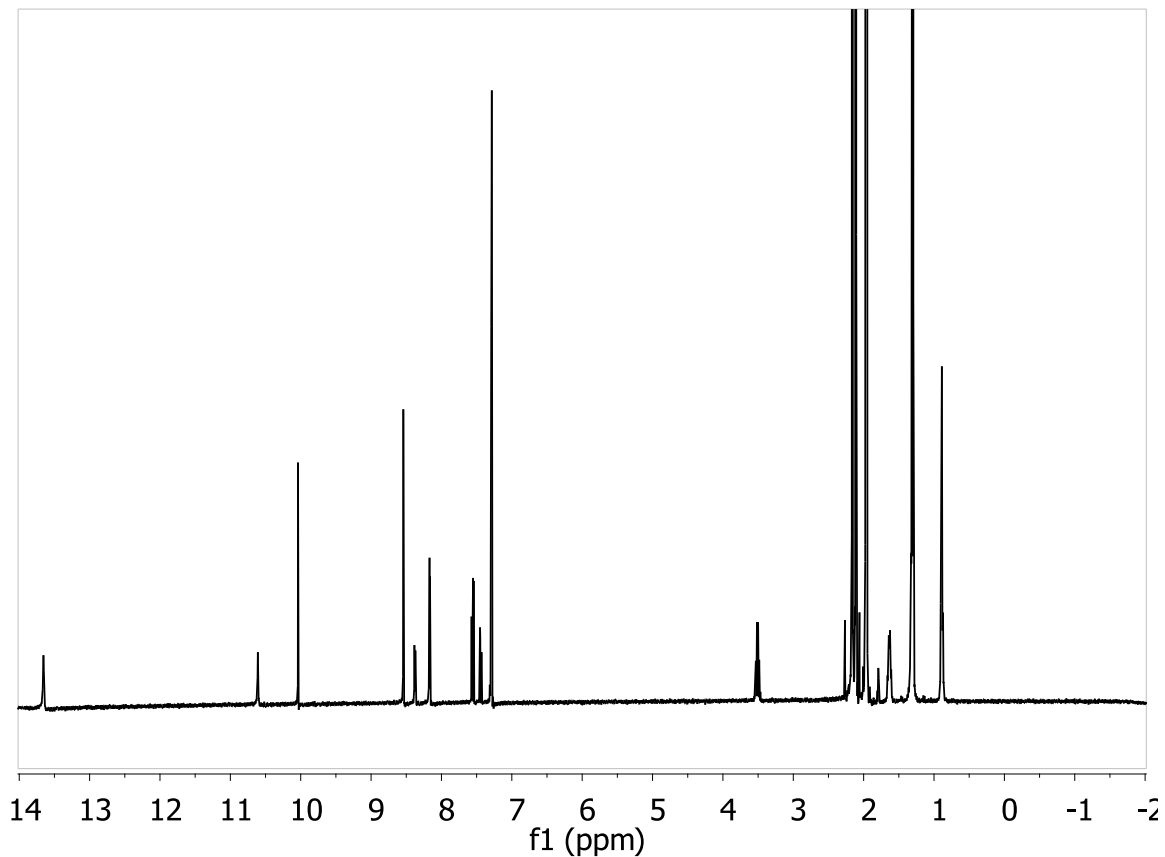

Figure S-15.  $^1\text{H}$  NMR of 10mM aldehyde **3** and 6mM **HPI**.

## VI. X-ray Crystallographic Data:

Table S-3. Crystal data and structure refinement for **1**.

|                      |                                                                                                      |                       |
|----------------------|------------------------------------------------------------------------------------------------------|-----------------------|
| Empirical formula    | C <sub>47</sub> H <sub>50</sub> F <sub>6</sub> Fe N <sub>6.50</sub> O <sub>9.50</sub> S <sub>2</sub> |                       |
| Formula weight       | 1091.91                                                                                              |                       |
| Temperature          | 153(2) K                                                                                             |                       |
| Wavelength           | 0.71069 Å                                                                                            |                       |
| Crystal system       | Orthorhombic                                                                                         |                       |
| Space group          | P21212                                                                                               |                       |
| Unit cell dimensions | a = 30.495(2) Å                                                                                      | $\alpha = 90^\circ$ . |
|                      | b = 12.5164(9) Å                                                                                     | $\beta = 90^\circ$ .  |
|                      | c = 13.3325(12) Å                                                                                    | $\gamma = 90^\circ$ . |
| Volume               | 5088.8(7) Å <sup>3</sup>                                                                             |                       |
| Z                    | 4                                                                                                    |                       |
| Density (calculated) | 1.425 Mg/m <sup>3</sup>                                                                              |                       |

|                                   |                                             |
|-----------------------------------|---------------------------------------------|
| Absorption coefficient            | 0.461 mm <sup>-1</sup>                      |
| F(000)                            | 2262                                        |
| Crystal size                      | 0.45 x 0.32 x 0.04 mm                       |
| Theta range for data collection   | 1.67 to 25.03°.                             |
| Index ranges                      | -36<=h<=36, 0<=k<=14, 0<=l<=15              |
| Reflections collected             | 8743                                        |
| Independent reflections           | 8743                                        |
| Completeness to theta = 25.03°    | 98.8 %                                      |
| Absorption correction             | Semi-empirical from equivalents             |
| Max. and min. transmission        | 1.12 and 0.929                              |
| Refinement method                 | Full-matrix least-squares on F <sup>2</sup> |
| Data / restraints / parameters    | 8743 / 1050 / 790                           |
| Goodness-of-fit on F <sup>2</sup> | 1.373                                       |
| Final R indices [I>2sigma(I)]     | R1 = 0.0948, wR2 = 0.1570                   |
| R indices (all data)              | R1 = 0.1689, wR2 = 0.1752                   |
| Absolute structure parameter      | 0.00(3)                                     |
| Largest diff. peak and hole       | 0.703 and -0.395 e.Å <sup>-3</sup>          |

Table S-4. Atomic coordinates ( $\times 10^4$ ) and equivalent isotropic displacement parameters ( $\text{\AA}^2 \times 10^3$ ) for 1.  $U(\text{eq})$  is defined as one third of the trace of the orthogonalized  $U^{ij}$  tensor.

|     | x       | y       | z        | $U(\text{eq})$ |
|-----|---------|---------|----------|----------------|
| Fe1 | 3142(1) | 1649(1) | 7490(1)  | 26(1)          |
| O1  | 1628(2) | 1159(4) | 9089(3)  | 40(1)          |
| O2  | 3281(2) | 1136(4) | 3626(3)  | 41(1)          |
| O3  | 4534(2) | 1068(5) | 9532(4)  | 62(2)          |
| N1  | 2600(2) | 802(4)  | 7578(4)  | 21(1)          |
| N2  | 2846(2) | 2445(4) | 8578(4)  | 24(1)          |
| N3  | 2881(2) | 2483(5) | 6389(4)  | 29(2)          |
| N4  | 3390(2) | 835(4)  | 6352(4)  | 24(1)          |
| N5  | 3458(2) | 761(5)  | 8474(4)  | 28(2)          |
| N6  | 3681(2) | 2496(4) | 7559(5)  | 29(1)          |
| C1  | 2485(2) | -62(6)  | 7044(5)  | 30(2)          |
| C2  | 2077(2) | -547(6) | 7168(5)  | 35(2)          |
| C3  | 1783(2) | -161(6) | 7839(5)  | 33(2)          |
| C4  | 1895(2) | 720(6)  | 8406(5)  | 31(2)          |
| C5  | 2303(2) | 1172(5) | 8247(5)  | 25(2)          |
| C6  | 2469(2) | 2095(5) | 8791(5)  | 29(2)          |
| C7  | 3036(2) | 3366(6) | 9183(5)  | 34(2)          |
| C8  | 3327(2) | 2899(6) | 9986(5)  | 35(2)          |
| C9  | 3210(3) | 2039(6) | 10577(5) | 42(2)          |
| C10 | 3484(3) | 1663(7) | 11309(6) | 50(2)          |
| C11 | 3875(3) | 2084(7) | 11482(6) | 50(2)          |
| C12 | 4007(3) | 2943(8) | 10945(7) | 58(3)          |
| C13 | 3732(3) | 3340(7) | 10201(6) | 47(2)          |
| C14 | 2686(2) | 4086(6) | 9660(5)  | 38(2)          |
| C15 | 3681(2) | 37(6)   | 6360(6)  | 34(2)          |
| C16 | 3850(3) | -402(6) | 5479(6)  | 40(2)          |
| C17 | 3723(2) | -56(6)  | 4588(6)  | 35(2)          |
| C18 | 3416(2) | 763(6)  | 4549(5)  | 32(2)          |
| C19 | 3264(2) | 1215(5) | 5437(5)  | 23(2)          |
| C20 | 2972(2) | 2120(6) | 5517(6)  | 34(2)          |
| C21 | 2573(2) | 3382(6) | 6469(5)  | 41(2)          |

|      |         |          |          |       |
|------|---------|----------|----------|-------|
| C22  | 2107(3) | 3007(6)  | 6641(5)  | 40(2) |
| C23  | 1923(3) | 2242(6)  | 6036(6)  | 45(2) |
| C24  | 1491(3) | 1940(8)  | 6160(7)  | 61(3) |
| C25  | 1226(3) | 2422(7)  | 6882(7)  | 57(2) |
| C26  | 1414(3) | 3201(7)  | 7493(7)  | 61(2) |
| C27  | 1857(3) | 3502(6)  | 7377(6)  | 47(2) |
| C28  | 2587(3) | 4128(6)  | 5572(5)  | 47(2) |
| C29  | 3333(3) | -150(6)  | 8893(5)  | 37(2) |
| C30  | 3607(3) | -735(7)  | 9551(6)  | 53(2) |
| C31  | 4007(3) | -332(8)  | 9793(6)  | 54(3) |
| C32  | 4144(3) | 610(7)   | 9371(6)  | 41(2) |
| C33  | 3866(2) | 1146(6)  | 8688(5)  | 32(2) |
| C34  | 3967(2) | 2117(6)  | 8179(6)  | 38(2) |
| C35  | 3775(3) | 3483(6)  | 6971(5)  | 40(2) |
| C36  | 3957(2) | 3198(6)  | 5955(6)  | 39(2) |
| C37  | 4253(2) | 2375(6)  | 5791(6)  | 44(2) |
| C38  | 4427(3) | 2177(7)  | 4835(7)  | 57(3) |
| C39  | 4310(3) | 2808(9)  | 4059(7)  | 68(3) |
| C40  | 4017(3) | 3650(8)  | 4201(7)  | 63(3) |
| C41  | 3840(3) | 3843(7)  | 5147(6)  | 47(2) |
| C42  | 4112(3) | 4226(6)  | 7513(7)  | 66(3) |
| S1B  | 2731(1) | 6800(2)  | 7553(3)  | 40(1) |
| F1B  | 3343(3) | 6017(8)  | 6424(7)  | 60(4) |
| F2B  | 3560(3) | 6484(10) | 7890(7)  | 87(5) |
| F3B  | 3428(3) | 7671(6)  | 6774(7)  | 80(3) |
| O1B  | 2497(4) | 7074(11) | 6645(8)  | 45(5) |
| O2B  | 2738(3) | 7638(9)  | 8291(8)  | 41(4) |
| O3B  | 2645(4) | 5749(6)  | 7934(9)  | 55(4) |
| C1B  | 3285(3) | 6732(7)  | 7144(7)  | 68(4) |
| S1BA | 2879(2) | 6299(5)  | 6915(5)  | 45(2) |
| F1BA | 3333(5) | 8012(12) | 7330(13) | 68(5) |
| F2BA | 3469(6) | 6673(17) | 8303(13) | 63(6) |
| F3BA | 2882(6) | 7541(18) | 8511(14) | 50(6) |
| O1BA | 2709(8) | 5515(12) | 7601(14) | 44(6) |
| O2BA | 3201(6) | 5911(17) | 6221(14) | 59(8) |
| O3BA | 2556(7) | 7000(20) | 6485(16) | 44(9) |

|      |         |          |           |        |
|------|---------|----------|-----------|--------|
| C1BA | 3145(5) | 7160(11) | 7791(10)  | 58(6)  |
| S1A  | 4521(1) | 6549(3)  | 10892(3)  | 43(1)  |
| F1A  | 4458(3) | 6091(8)  | 8999(5)   | 88(3)  |
| F2A  | 5071(3) | 6762(8)  | 9409(6)   | 86(3)  |
| F3A  | 4925(4) | 5143(8)  | 9807(6)   | 104(4) |
| O1A  | 4192(4) | 5741(10) | 11083(10) | 50(6)  |
| O2A  | 4883(3) | 6536(7)  | 11576(6)  | 53(3)  |
| O3A  | 4346(3) | 7585(6)  | 10669(7)  | 61(3)  |
| C1A  | 4753(3) | 6127(8)  | 9738(7)   | 83(5)  |
| S1C  | 5130(1) | 641(3)   | 11949(3)  | 40(1)  |
| F1C  | 4861(2) | -69(8)   | 13680(4)  | 57(3)  |
| F2C  | 4891(3) | -1257(5) | 12535(7)  | 70(3)  |
| F3C  | 4377(2) | -94(8)   | 12522(8)  | 69(3)  |
| O1C  | 4958(3) | 1676(5)  | 12228(7)  | 57(3)  |
| O2C  | 5570(2) | 440(9)   | 12255(8)  | 50(3)  |
| O3C  | 5026(4) | 318(6)   | 10940(4)  | 39(3)  |
| C1C  | 4807(3) | -238(7)  | 12695(6)  | 61(3)  |
| N1E  | 4240(7) | 5677(16) | 11419(19) | 47(6)  |
| C2E  | 4538(7) | 5666(15) | 11891(15) | 57(5)  |
| C3E  | 4897(5) | 5725(13) | 12516(15) | 57(4)  |

---

Table S-5. Bond lengths [ $\text{\AA}$ ] and angles [ $^\circ$ ] for 1.

|         |           |           |           |
|---------|-----------|-----------|-----------|
| Fe1-N6  | 1.958(5)  | C15-C16   | 1.395(10) |
| Fe1-N1  | 1.968(5)  | C16-C17   | 1.323(9)  |
| Fe1-N3  | 1.970(6)  | C17-C18   | 1.388(10) |
| Fe1-N5  | 1.971(6)  | C18-C19   | 1.392(9)  |
| Fe1-N2  | 1.978(5)  | C19-C20   | 1.443(9)  |
| Fe1-N4  | 1.978(6)  | C21-C28   | 1.517(9)  |
| O1-C4   | 1.339(8)  | C21-C22   | 1.515(10) |
| O2-C18  | 1.380(8)  | C22-C23   | 1.372(10) |
| O3-C32  | 1.336(9)  | C22-C27   | 1.388(10) |
| N1-C1   | 1.341(8)  | C23-C24   | 1.379(11) |
| N1-C5   | 1.352(8)  | C24-C25   | 1.394(11) |
| N2-C6   | 1.264(8)  | C25-C26   | 1.394(12) |
| N2-C7   | 1.522(9)  | C26-C27   | 1.413(11) |
| N3-C20  | 1.279(8)  | C29-C30   | 1.416(10) |
| N3-C21  | 1.469(9)  | C30-C31   | 1.359(11) |
| N4-C15  | 1.336(8)  | C31-C32   | 1.372(12) |
| N4-C19  | 1.365(8)  | C32-C33   | 1.415(10) |
| N5-C29  | 1.326(9)  | C33-C34   | 1.426(10) |
| N5-C33  | 1.365(9)  | C35-C36   | 1.507(10) |
| N6-C34  | 1.292(9)  | C35-C42   | 1.562(10) |
| N6-C35  | 1.490(9)  | C36-C37   | 1.387(10) |
| C1-C2   | 1.394(9)  | C36-C41   | 1.394(11) |
| C2-C3   | 1.355(9)  | C37-C38   | 1.402(10) |
| C3-C4   | 1.380(9)  | C38-C39   | 1.350(12) |
| C4-C5   | 1.385(9)  | C39-C40   | 1.394(12) |
| C5-C6   | 1.455(9)  | C40-C41   | 1.393(11) |
| C7-C8   | 1.509(10) | S1B-O3B   | 1.434(6)  |
| C7-C14  | 1.534(9)  | S1B-O2B   | 1.438(6)  |
| C8-C13  | 1.382(10) | S1B-O1B   | 1.446(6)  |
| C8-C9   | 1.381(10) | S1B-C1B   | 1.778(9)  |
| C9-C10  | 1.369(10) | F1B-C1B   | 1.325(8)  |
| C10-C11 | 1.322(10) | F2B-C1B   | 1.338(8)  |
| C11-C12 | 1.353(11) | F3B-C1B   | 1.347(8)  |
| C12-C13 | 1.391(11) | S1BA-O2BA | 1.433(7)  |

|            |           |            |          |
|------------|-----------|------------|----------|
| S1BA-O1BA  | 1.439(7)  | F2A-C1A    | 1.328(8) |
| S1BA-O3BA  | 1.441(7)  | F3A-C1A    | 1.343(8) |
| S1BA-C1BA  | 1.783(10) | S1C-O2C    | 1.424(6) |
| F1BA-C1BA  | 1.358(9)  | S1C-O3C    | 1.440(6) |
| F2BA-C1BA  | 1.347(10) | S1C-O1C    | 1.446(6) |
| F3BA-C1BA  | 1.338(10) | S1C-C1C    | 1.779(9) |
| S1A-O2A    | 1.432(6)  | F1C-C1C    | 1.340(8) |
| S1A-O3A    | 1.434(6)  | F2C-C1C    | 1.318(8) |
| S1A-O1A    | 1.447(7)  | F3C-C1C    | 1.344(8) |
| S1A-C1A    | 1.775(9)  | N1E-C2E    | 1.11(3)  |
| F1A-C1A    | 1.335(8)  | C2E-C3E    | 1.38(2)  |
| N6-Fe1-N1  | 173.9(3)  | C15-N4-C19 | 117.1(6) |
| N6-Fe1-N3  | 95.1(2)   | C15-N4-Fe1 | 129.3(5) |
| N1-Fe1-N3  | 89.4(2)   | C19-N4-Fe1 | 113.5(4) |
| N6-Fe1-N5  | 82.2(2)   | C29-N5-C33 | 118.6(6) |
| N1-Fe1-N5  | 93.8(2)   | C29-N5-Fe1 | 128.7(5) |
| N3-Fe1-N5  | 173.1(2)  | C33-N5-Fe1 | 112.7(5) |
| N6-Fe1-N2  | 94.4(2)   | C34-N6-C35 | 120.7(6) |
| N1-Fe1-N2  | 81.0(2)   | C34-N6-Fe1 | 113.4(5) |
| N3-Fe1-N2  | 95.5(2)   | C35-N6-Fe1 | 125.9(5) |
| N5-Fe1-N2  | 91.1(2)   | N1-C1-C2   | 121.4(6) |
| N6-Fe1-N4  | 89.6(2)   | C3-C2-C1   | 120.9(7) |
| N1-Fe1-N4  | 95.1(2)   | C2-C3-C4   | 118.9(7) |
| N3-Fe1-N4  | 81.7(2)   | O1-C4-C3   | 123.4(6) |
| N5-Fe1-N4  | 91.9(2)   | O1-C4-C5   | 118.9(6) |
| N2-Fe1-N4  | 175.3(2)  | C3-C4-C5   | 117.6(6) |
| C1-N1-C5   | 116.9(6)  | N1-C5-C4   | 124.3(6) |
| C1-N1-Fe1  | 128.5(5)  | N1-C5-C6   | 111.7(6) |
| C5-N1-Fe1  | 114.6(4)  | C4-C5-C6   | 124.0(6) |
| C6-N2-C7   | 119.3(6)  | N2-C6-C5   | 118.6(6) |
| C6-N2-Fe1  | 114.0(5)  | C8-C7-N2   | 107.8(6) |
| C7-N2-Fe1  | 126.7(4)  | C8-C7-C14  | 110.0(6) |
| C20-N3-C21 | 118.5(6)  | N2-C7-C14  | 113.6(5) |
| C20-N3-Fe1 | 113.6(5)  | C13-C8-C9  | 115.1(8) |
| C21-N3-Fe1 | 127.6(4)  | C13-C8-C7  | 121.2(7) |



|             |          |                |           |
|-------------|----------|----------------|-----------|
| C9-C8-C7    | 123.7(7) | N6-C34-C33     | 118.2(7)  |
| C10-C9-C8   | 121.1(8) | N6-C35-C36     | 110.3(6)  |
| C11-C10-C9  | 122.6(9) | N6-C35-C42     | 112.2(6)  |
| C10-C11-C12 | 119.5(8) | C36-C35-C42    | 108.3(6)  |
| C11-C12-C13 | 118.8(8) | C37-C36-C41    | 118.4(7)  |
| C8-C13-C12  | 123.0(9) | C37-C36-C35    | 123.9(7)  |
| N4-C15-C16  | 122.3(7) | C41-C36-C35    | 117.6(7)  |
| C17-C16-C15 | 121.2(7) | C36-C37-C38    | 121.4(8)  |
| C16-C17-C18 | 118.3(7) | C39-C38-C37    | 119.6(9)  |
| O2-C18-C17  | 119.0(6) | C38-C39-C40    | 120.4(9)  |
| O2-C18-C19  | 121.4(6) | C41-C40-C39    | 120.3(9)  |
| C17-C18-C19 | 119.6(6) | C40-C41-C36    | 120.0(8)  |
| N4-C19-C18  | 121.6(6) | O3B-S1B-O2B    | 115.5(5)  |
| N4-C19-C20  | 112.4(6) | O3B-S1B-O1B    | 115.1(5)  |
| C18-C19-C20 | 126.0(6) | O2B-S1B-O1B    | 114.0(5)  |
| N3-C20-C19  | 118.7(7) | O3B-S1B-C1B    | 103.8(5)  |
| N3-C21-C28  | 113.4(6) | O2B-S1B-C1B    | 103.2(4)  |
| N3-C21-C22  | 111.9(6) | O1B-S1B-C1B    | 102.9(5)  |
| C28-C21-C22 | 109.7(6) | F1B-C1B-F2B    | 107.3(7)  |
| C23-C22-C27 | 120.2(8) | F1B-C1B-F3B    | 106.3(7)  |
| C23-C22-C21 | 120.8(7) | F2B-C1B-F3B    | 105.8(7)  |
| C27-C22-C21 | 118.9(8) | F1B-C1B-S1B    | 112.5(6)  |
| C22-C23-C24 | 120.7(8) | F2B-C1B-S1B    | 112.3(6)  |
| C23-C24-C25 | 121.2(9) | F3B-C1B-S1B    | 112.2(6)  |
| C24-C25-C26 | 117.9(9) | O2BA-S1BA-O1BA | 115.2(7)  |
| C25-C26-C27 | 121.0(8) | O2BA-S1BA-O3BA | 114.7(7)  |
| C22-C27-C26 | 119.0(8) | O1BA-S1BA-O3BA | 115.0(7)  |
| N5-C29-C30  | 122.4(7) | O2BA-S1BA-C1BA | 108.5(12) |
| C31-C30-C29 | 119.0(8) | O1BA-S1BA-C1BA | 99.2(10)  |
| C30-C31-C32 | 119.8(8) | O3BA-S1BA-C1BA | 101.7(13) |
| O3-C32-C31  | 125.1(8) | F3BA-C1BA-F2BA | 103.7(15) |
| O3-C32-C33  | 115.7(8) | F3BA-C1BA-F1BA | 107.4(17) |
| C31-C32-C33 | 119.2(8) | F2BA-C1BA-F1BA | 106.0(16) |
| N5-C33-C32  | 121.0(7) | F3BA-C1BA-S1BA | 114.4(12) |
| N5-C33-C34  | 113.5(7) | F2BA-C1BA-S1BA | 113.0(11) |
| C32-C33-C34 | 125.5(7) | F1BA-C1BA-S1BA | 111.7(11) |

|             |          |
|-------------|----------|
| O2A-S1A-O3A | 115.5(5) |
| O2A-S1A-O1A | 114.5(5) |
| O3A-S1A-O1A | 114.2(5) |
| O2A-S1A-C1A | 104.0(4) |
| O3A-S1A-C1A | 103.7(4) |
| O1A-S1A-C1A | 102.8(5) |
| F2A-C1A-F1A | 105.7(7) |
| F2A-C1A-F3A | 106.7(7) |
| F1A-C1A-F3A | 106.5(7) |
| F2A-C1A-S1A | 113.6(6) |
| F1A-C1A-S1A | 112.3(6) |
| F3A-C1A-S1A | 111.7(6) |
| O2C-S1C-O3C | 115.1(5) |
| O2C-S1C-O1C | 115.3(5) |
| O3C-S1C-O1C | 114.3(5) |
| O2C-S1C-C1C | 104.5(4) |
| O3C-S1C-C1C | 103.1(4) |
| O1C-S1C-C1C | 102.1(4) |
| F2C-C1C-F1C | 106.7(7) |
| F2C-C1C-F3C | 106.9(7) |
| F1C-C1C-F3C | 105.5(7) |
| F2C-C1C-S1C | 113.6(6) |
| F1C-C1C-S1C | 112.5(6) |
| F3C-C1C-S1C | 111.1(6) |
| N1E-C2E-C3E | 175(2)   |

Table S-6. Anisotropic displacement parameters ( $\text{\AA}^2 \times 10^3$ ) for 1. The anisotropic displacement factor exponent takes the form:  $-2\pi^2 [ h^2 a^{*2} U^{11} + \dots + 2 h k a^* b^* U^{12} ]$

|     | U <sup>11</sup> | U <sup>22</sup> | U <sup>33</sup> | U <sup>23</sup> | U <sup>13</sup> | U <sup>12</sup> |
|-----|-----------------|-----------------|-----------------|-----------------|-----------------|-----------------|
| Fe1 | 33(1)           | 24(1)           | 21(1)           | 0(1)            | 1(1)            | 2(1)            |
| O1  | 50(3)           | 44(3)           | 26(3)           | -6(3)           | 7(3)            | 2(3)            |
| O2  | 51(3)           | 50(3)           | 21(3)           | 1(3)            | 7(3)            | -3(3)           |
| O3  | 41(4)           | 98(5)           | 48(4)           | -16(3)          | -18(3)          | 4(3)            |
| N1  | 33(3)           | 16(3)           | 15(3)           | 1(3)            | 1(3)            | 4(2)            |
| N2  | 28(3)           | 25(3)           | 20(3)           | -5(3)           | 5(3)            | 4(3)            |
| N3  | 41(4)           | 32(4)           | 14(3)           | -4(3)           | 11(3)           | 6(3)            |
| N4  | 24(3)           | 26(4)           | 22(3)           | 5(3)            | 3(3)            | 4(3)            |
| N5  | 38(4)           | 28(4)           | 18(3)           | -2(3)           | 8(3)            | -6(3)           |
| N6  | 28(3)           | 24(3)           | 33(3)           | -1(3)           | 0(3)            | 0(2)            |
| C1  | 37(4)           | 25(4)           | 28(4)           | 11(3)           | 4(3)            | 9(3)            |
| C2  | 35(4)           | 37(4)           | 34(5)           | -8(3)           | -4(4)           | -6(4)           |
| C3  | 34(4)           | 38(4)           | 28(4)           | 4(3)            | -5(3)           | -9(3)           |
| C4  | 31(4)           | 42(4)           | 18(4)           | 5(3)            | 5(3)            | -2(4)           |
| C5  | 24(4)           | 31(4)           | 20(4)           | 3(3)            | 2(3)            | 6(3)            |
| C6  | 33(4)           | 31(4)           | 24(4)           | 2(3)            | 6(3)            | 5(3)            |
| C7  | 42(4)           | 30(4)           | 29(4)           | -4(4)           | -1(3)           | -3(4)           |
| C8  | 34(4)           | 47(5)           | 24(4)           | -13(4)          | 8(3)            | 1(4)            |
| C9  | 56(5)           | 50(5)           | 22(4)           | -4(4)           | 4(4)            | -1(4)           |
| C10 | 56(5)           | 64(5)           | 31(4)           | -5(4)           | -4(4)           | 10(5)           |
| C11 | 51(5)           | 68(6)           | 30(4)           | -13(4)          | -13(4)          | 10(4)           |
| C12 | 51(5)           | 72(6)           | 50(5)           | -26(5)          | -15(5)          | 3(5)            |
| C13 | 41(4)           | 56(5)           | 44(5)           | -22(4)          | 5(4)            | 7(4)            |
| C14 | 54(5)           | 29(5)           | 30(4)           | -23(4)          | 6(4)            | 5(4)            |
| C15 | 37(4)           | 36(4)           | 28(4)           | -2(4)           | -3(4)           | 0(4)            |
| C16 | 43(5)           | 33(5)           | 44(5)           | -13(4)          | 9(4)            | 9(4)            |
| C17 | 40(4)           | 40(4)           | 24(4)           | -5(4)           | 0(4)            | 6(4)            |
| C18 | 38(4)           | 35(4)           | 22(4)           | 4(4)            | -2(4)           | -7(4)           |
| C19 | 16(4)           | 27(4)           | 25(4)           | -2(3)           | 4(3)            | -2(3)           |
| C20 | 38(4)           | 37(4)           | 27(4)           | 6(4)            | 1(3)            | 1(4)            |
| C21 | 52(5)           | 35(4)           | 35(4)           | 11(4)           | 4(4)            | 15(4)           |

|      |        |        |        |        |         |        |
|------|--------|--------|--------|--------|---------|--------|
| C22  | 57(5)  | 43(5)  | 19(4)  | 10(4)  | 7(4)    | 19(4)  |
| C23  | 45(5)  | 50(5)  | 41(5)  | 9(4)   | 8(4)    | 18(4)  |
| C24  | 60(5)  | 66(6)  | 58(5)  | 13(5)  | -2(5)   | 8(5)   |
| C25  | 51(5)  | 74(6)  | 48(5)  | 27(5)  | 4(4)    | 14(5)  |
| C26  | 65(5)  | 79(5)  | 39(4)  | 9(5)   | 14(5)   | 34(4)  |
| C27  | 53(4)  | 56(5)  | 32(4)  | 10(4)  | -2(4)   | 23(4)  |
| C28  | 75(6)  | 32(5)  | 34(5)  | 11(4)  | 18(4)   | 20(4)  |
| C29  | 47(4)  | 38(5)  | 26(4)  | 4(4)   | -1(4)   | 6(4)   |
| C30  | 78(6)  | 46(5)  | 35(5)  | 12(4)  | 4(5)    | 10(5)  |
| C31  | 44(5)  | 69(6)  | 49(5)  | 2(5)   | -5(4)   | 25(5)  |
| C32  | 39(5)  | 56(5)  | 27(4)  | -14(4) | -6(4)   | 17(4)  |
| C33  | 35(4)  | 39(4)  | 22(4)  | -4(4)  | 0(3)    | 0(4)   |
| C34  | 29(4)  | 43(5)  | 40(4)  | -20(4) | 1(4)    | 5(4)   |
| C35  | 53(5)  | 25(4)  | 42(4)  | -5(4)  | 18(4)   | -8(4)  |
| C36  | 44(4)  | 30(4)  | 44(5)  | -11(4) | 8(4)    | -21(4) |
| C37  | 50(5)  | 34(5)  | 49(5)  | 3(4)   | 23(4)   | -8(4)  |
| C38  | 56(5)  | 56(5)  | 58(5)  | -10(5) | 20(5)   | -10(4) |
| C39  | 67(6)  | 85(6)  | 51(5)  | -32(5) | 4(5)    | -14(5) |
| C40  | 45(5)  | 86(6)  | 56(6)  | 6(5)   | -11(4)  | -14(5) |
| C41  | 45(5)  | 55(5)  | 42(5)  | -3(4)  | 9(4)    | -1(4)  |
| C42  | 93(6)  | 50(5)  | 54(5)  | -10(6) | 18(6)   | -41(5) |
| S1B  | 42(2)  | 38(2)  | 39(2)  | 5(2)   | -2(2)   | -7(1)  |
| F1B  | 66(6)  | 57(6)  | 57(6)  | -42(5) | 13(6)   | -3(5)  |
| F2B  | 73(7)  | 110(9) | 78(9)  | -26(7) | -14(6)  | 29(6)  |
| F3B  | 93(7)  | 57(6)  | 91(8)  | -6(6)  | 30(6)   | -33(5) |
| O1B  | 51(8)  | 42(8)  | 43(8)  | 6(6)   | -12(7)  | -11(6) |
| O2B  | 49(8)  | 39(6)  | 35(7)  | -17(5) | -8(6)   | 6(6)   |
| O3B  | 79(8)  | 41(7)  | 45(8)  | 9(6)   | 11(6)   | -17(6) |
| C1B  | 73(8)  | 64(7)  | 67(8)  | -15(7) | -1(7)   | -4(7)  |
| S1BA | 51(4)  | 42(4)  | 40(3)  | -6(3)  | 3(3)    | 7(3)   |
| F1BA | 76(9)  | 59(9)  | 70(10) | 7(9)   | -6(9)   | -27(7) |
| F2BA | 54(9)  | 80(11) | 55(10) | -27(9) | -32(8)  | 20(8)  |
| F3BA | 48(10) | 57(10) | 45(10) | -21(8) | -15(9)  | 7(8)   |
| O1BA | 69(11) | 29(9)  | 33(11) | -6(9)  | 3(10)   | -11(8) |
| O2BA | 76(14) | 47(12) | 54(12) | -17(9) | -14(11) | 10(10) |
| O3BA | 47(13) | 51(15) | 35(12) | 3(10)  | -4(10)  | 17(11) |

|      |         |        |        |        |        |        |
|------|---------|--------|--------|--------|--------|--------|
| C1BA | 53(9)   | 58(9)  | 63(10) | 4(8)   | -3(8)  | -5(8)  |
| S1A  | 42(2)   | 43(3)  | 44(2)  | 6(2)   | 8(2)   | -1(2)  |
| F1A  | 81(7)   | 130(8) | 52(6)  | -29(6) | -17(6) | 4(6)   |
| F2A  | 84(7)   | 95(7)  | 80(7)  | -13(6) | 38(6)  | -27(6) |
| F3A  | 114(10) | 105(8) | 93(6)  | -22(9) | 39(8)  | 25(7)  |
| O1A  | 45(9)   | 55(9)  | 50(10) | 5(7)   | 0(7)   | 1(7)   |
| O2A  | 42(6)   | 58(7)  | 58(7)  | 2(6)   | -14(5) | -14(6) |
| O3A  | 60(7)   | 41(7)  | 84(8)  | 21(6)  | 4(6)   | 15(6)  |
| C1A  | 84(8)   | 90(8)  | 75(8)  | -11(7) | 13(7)  | 0(7)   |
| S1C  | 35(2)   | 48(3)  | 36(2)  | -10(2) | 2(2)   | 0(2)   |
| F1C  | 66(7)   | 64(5)  | 40(4)  | -5(5)  | 16(4)  | 5(6)   |
| F2C  | 85(6)   | 60(5)  | 64(5)  | -7(5)  | 18(5)  | 3(5)   |
| F3C  | 67(5)   | 65(6)  | 74(6)  | -1(6)  | 7(5)   | -10(5) |
| O1C  | 59(6)   | 55(6)  | 56(6)  | -15(5) | 1(5)   | 4(5)   |
| O2C  | 38(5)   | 64(6)  | 49(6)  | 5(5)   | -3(5)  | -2(5)  |
| O3C  | 40(5)   | 48(7)  | 30(4)  | 1(4)   | -4(5)  | 7(6)   |
| C1C  | 66(6)   | 57(5)  | 58(5)  | -7(5)  | 6(5)   | 0(5)   |
| N1E  | 44(11)  | 40(10) | 57(12) | -13(8) | 7(9)   | 1(9)   |
| C2E  | 56(8)   | 55(8)  | 59(9)  | -3(7)  | -5(8)  | 1(7)   |
| C3E  | 52(7)   | 66(8)  | 54(8)  | -6(8)  | -2(8)  | 3(7)   |

---

Table S-7. Hydrogen coordinates ( $\times 10^4$ ) and isotropic displacement parameters ( $\text{\AA}^2 \times 10^{-3}$ ) for 1.

|      | x    | y     | z     | U(eq) |
|------|------|-------|-------|-------|
| H1O  | 1778 | 1455  | 9538  | 60    |
| H2O  | 3500 | 1333  | 3293  | 61    |
| H3O  | 4646 | 813   | 10055 | 94    |
| H1   | 2686 | -350  | 6571  | 36    |
| H2   | 2004 | -1155 | 6776  | 42    |
| H3   | 1505 | -492  | 7917  | 40    |
| H6   | 2297 | 2428  | 9296  | 35    |
| H7   | 3221 | 3813  | 8728  | 40    |
| H9   | 2934 | 1703  | 10474 | 51    |
| H10  | 3390 | 1077  | 11708 | 60    |
| H11  | 4061 | 1785  | 11980 | 59    |
| H12  | 4282 | 3269  | 11075 | 69    |
| H13  | 3827 | 3940  | 9824  | 56    |
| H14A | 2469 | 4286  | 9152  | 56    |
| H14B | 2825 | 4732  | 9927  | 56    |
| H14C | 2541 | 3700  | 10206 | 56    |
| H15  | 3776 | -241  | 6986  | 41    |
| H16  | 4061 | -959  | 5520  | 48    |
| H17  | 3838 | -360  | 3990  | 42    |
| H20  | 2851 | 2440  | 4933  | 41    |
| H21  | 2661 | 3808  | 7070  | 49    |
| H23  | 2094 | 1918  | 5525  | 54    |
| H24  | 1373 | 1394  | 5747  | 73    |
| H25  | 927  | 2226  | 6954  | 69    |
| H26  | 1241 | 3535  | 7997  | 74    |
| H27  | 1982 | 4036  | 7795  | 56    |
| H28A | 2893 | 4290  | 5405  | 70    |
| H28B | 2432 | 4792  | 5735  | 70    |
| H28C | 2445 | 3784  | 4997  | 70    |
| H29  | 3049 | -419  | 8747  | 44    |

|      |      |       |       |    |
|------|------|-------|-------|----|
| H30  | 3512 | -1400 | 9819  | 63 |
| H31  | 4190 | -701  | 10252 | 65 |
| H34  | 4237 | 2476  | 8293  | 45 |
| H35  | 3495 | 3886  | 6876  | 48 |
| H37  | 4340 | 1937  | 6338  | 53 |
| H38  | 4625 | 1602  | 4734  | 68 |
| H39  | 4429 | 2679  | 3411  | 81 |
| H40  | 3938 | 4093  | 3652  | 75 |
| H41  | 3639 | 4414  | 5240  | 57 |
| H42A | 4019 | 4339  | 8208  | 98 |
| H42B | 4126 | 4915  | 7165  | 98 |
| H42C | 4402 | 3890  | 7505  | 98 |

## VII. Computational Details:

Molecular mechanics calculations were run with Spartan'10 (Wavefunction, Inc., Irvine, CA) with defaults grids and convergence criteria. Density functional theory (DFT), time-dependent DFT (TDDFT) calculations and ZINDO calculations were run with Gaussian '09<sup>1</sup> with default grids and convergence criteria.

The starting geometry for the calculations was obtained from the X-ray structure of *S-MBI- $\Delta$ -fac* Fe(II) complex, which was edited to obtain all possible isomers of (*S-S-S*)-**MBI**-Fe(II) complex. A conformational search was run on these structures using Merck Molecular force field (MMFF) and the Monte Carlo algorithm implemented in Spartan'10. All MMFF minima were then optimized with DFT using BPV86 functional, which consists of Becke's 1986 exchange functional and Becke-Perdew correlation functional with Vosko-Wilk-Nusair local density approximation.<sup>2</sup> Other functionals were also tested, including: B3LYP; LC-BPV86, where BPV86 is modified with Hirao's long-range correction; Truhlar and Zhao's M06-2X.<sup>2</sup> The basis set was the triple- $\zeta$  Ahlrich's TZVP set for H, C, N and O, and LanL2DZ basis set for Fe which

consists of a double- $\zeta$  basis and a Los Alamos effective core potential (ECP).<sup>3</sup> In some cases, the Polarizable Continuum solvent Model (PCM) for acetonitrile was used.<sup>4</sup>

CD calculations were run using both ZINDO method and TDDFT method, at the same level of calculation employed for the geometry optimizations [BPV86/TZVP+Lan2DZ(Fe)]. ECD spectra were generated using the program SpecDis (v. 1.50, T. Bruhn, V. Hemberger, A. Schaumlöffel, G. Bringmann, Univ. Würzburg, Germany, 2010) by applying a Gaussian band shape with 0.22 eV exponential half-width, from dipole-length rotational strengths; the difference from dipole-velocity values was negligible (<10%) for most transitions.

The model ligand 2-((methylimino)methyl)pyridin-3-ol (**MIP**) was optimized at B3LYP/6-31G(d) and resulting geometry had Cs symmetry. Excited-state calculations were run on **MIP** with ZINDO and TDDFT method at CAM-B3LYP/SVP level.<sup>2,3</sup>



|                                                                                    |                                                                                     |
|------------------------------------------------------------------------------------|-------------------------------------------------------------------------------------|
| 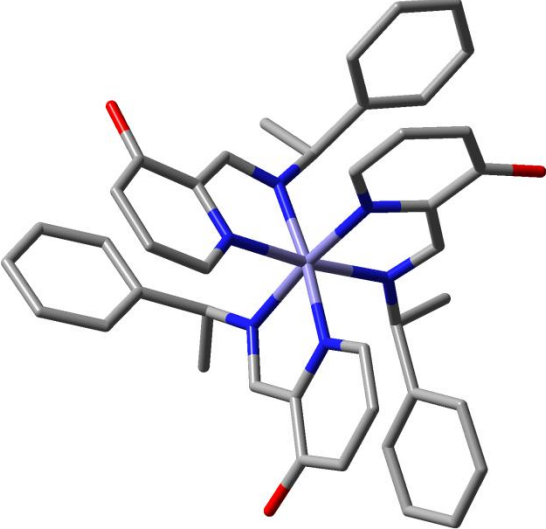  |   |
| <p><math>\Delta</math>-<i>fac</i> (global minimum)</p>                             | <p><math>\Lambda</math>-<i>mer</i> (+0.57 kcal/mol)</p>                             |
|  |  |
| <p><math>\Delta</math>-<i>mer</i> (+3.46 kcal/mol)</p>                             | <p><math>\Lambda</math>-<i>fac</i> (+7.08 kcal/mol)</p>                             |

Table S-8. DFT-optimized structures for (*S,S,S*)-**MBI**-Fe(II) complex at BPV86/TZVP+ LanL2DZ(Fe) level, with relative internal energies. The lowest-energy conformer is shown for each diastereomer. Hydrogen atoms omitted for clarity.

## References:

(1) Frisch, M. J.; Trucks, G. W.; Schlegel, H. B.; Scuseria, G. E.; Robb, M. A.; Cheeseman, J. R.; Scalmani, G.; Barone, V.; Mennucci, B.; Petersson, G. A.; Nakatsuji, H.; Caricato, M.; Li, X.; Hratchian, H. P.; Izmaylov, A. F.; Bloino, J.; Zheng, G.; Sonnenberg, J. L.; Hada, M.; Ehara, M.; Toyota, K.; Fukuda, R.; Hasegawa, J.; Ishida, M.; Nakajima, T.; Honda, Y.; Kitao, O.; Nakai, H.; Vreven, T.; Montgomery, J. A.; Peralta, J. E.; Ogliaro, F.; Bearpark, M.; Heyd, J. J.; Brothers, E.; Kudin, K. N.; Staroverov, V. N.; Kobayashi, R.; Normand, J.; Raghavachari, K.; Rendell, A.; Burant, J. C.; Iyengar, S. S.; Tomasi, J.; Cossi, M.; Rega, N.; Millam, J. M.; Klene, M.; Knox, J. E.; Cross, J. B.; Bakken, V.; Adamo, C.; Jaramillo, J.; Gomperts, R.; Stratmann, R. E.; Yazyev, O.; Austin, A. J.; Cammi, R.; Pomelli, C.; Ochterski, J. W.; Martin, R. L.; Morokuma, K.; Zakrzewski, V. G.; Voth, G. A.; Salvador, P.; Dannenberg, J. J.; Dapprich, S.; Daniels, A. D.; Farkas; Foresman, J. B.; Ortiz, J. V.; Cioslowski, J.; Fox, D. J. Wallingford CT, 2009.

(2) All references about DFT functionals can be found in the on-line documentation for Gaussian'09 at [http://www.gaussian.com/g\\_tech/g\\_ur/k\\_dft.htm](http://www.gaussian.com/g_tech/g_ur/k_dft.htm).

(3) All references about basis sets can be found in the on-line documentation for Gaussian'09 at [http://www.gaussian.com/g\\_tech/g\\_ur/m\\_basis\\_sets.htm](http://www.gaussian.com/g_tech/g_ur/m_basis_sets.htm).

(4) *Continuum Solvation Models in Chemical Physics: From Theory to Applications* Mennucci, B.; Cammi, R., Eds.; Wiley: Chichester, 2007.
